# Supplementary material
Source: PubMed Central journal article supplement (PMC1838750)

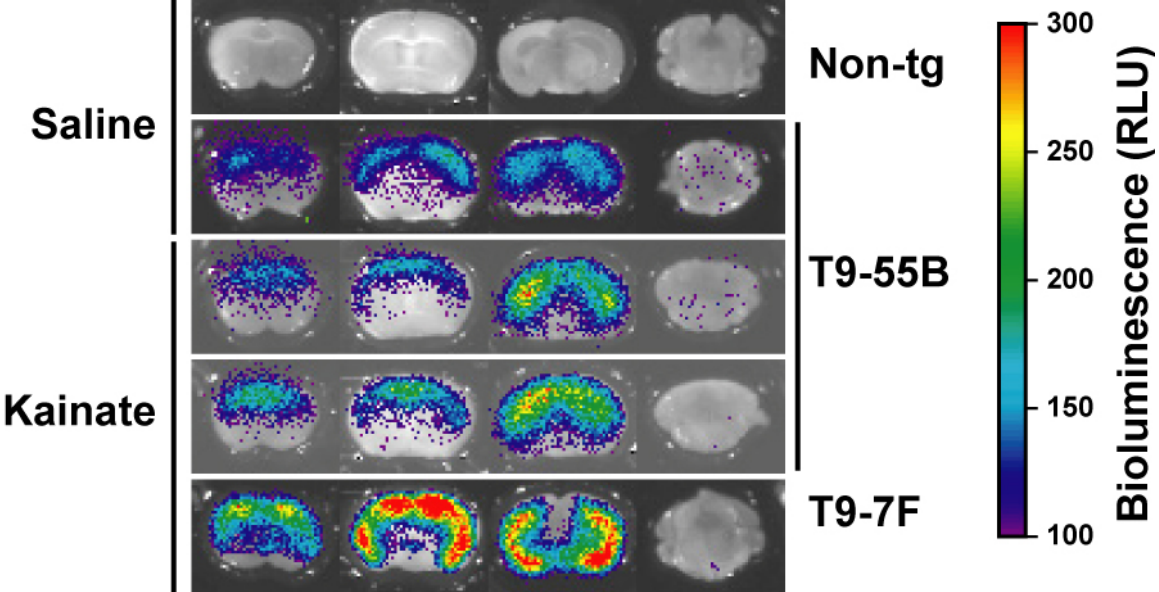

Supplement: pnas_0605077103_1.pdf [file pnas_0605077103_1.pdf]

Luciferase activity  
(RLUx10<sup>3</sup>/mg)

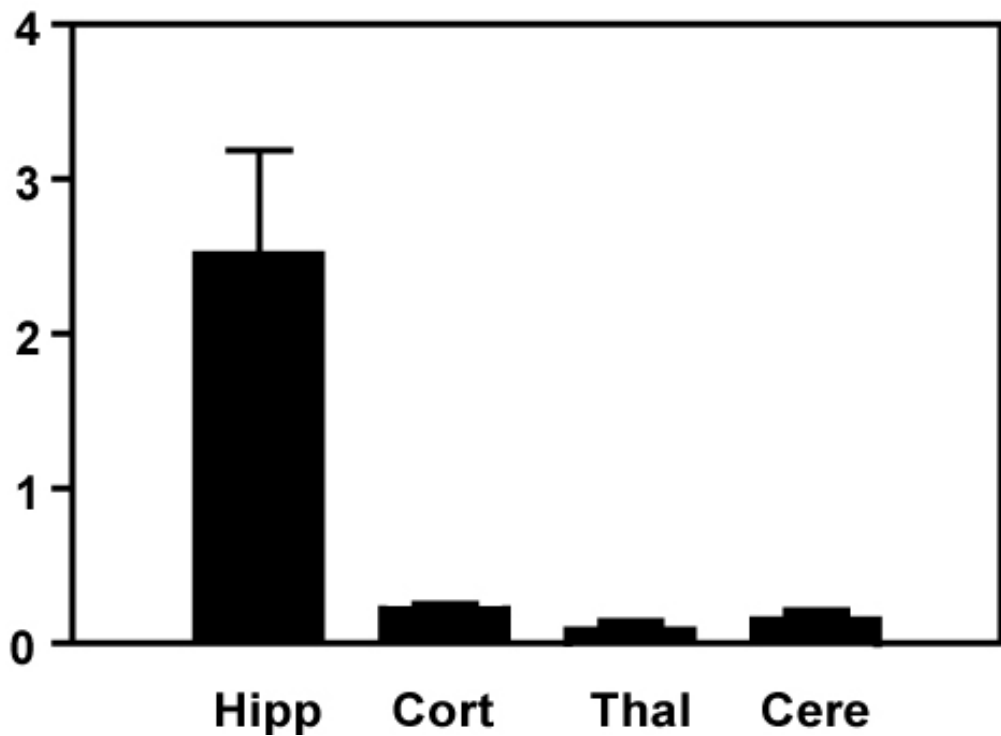

Supplement: pnas_0605077103_2.pdf [file pnas_0605077103_2.pdf]

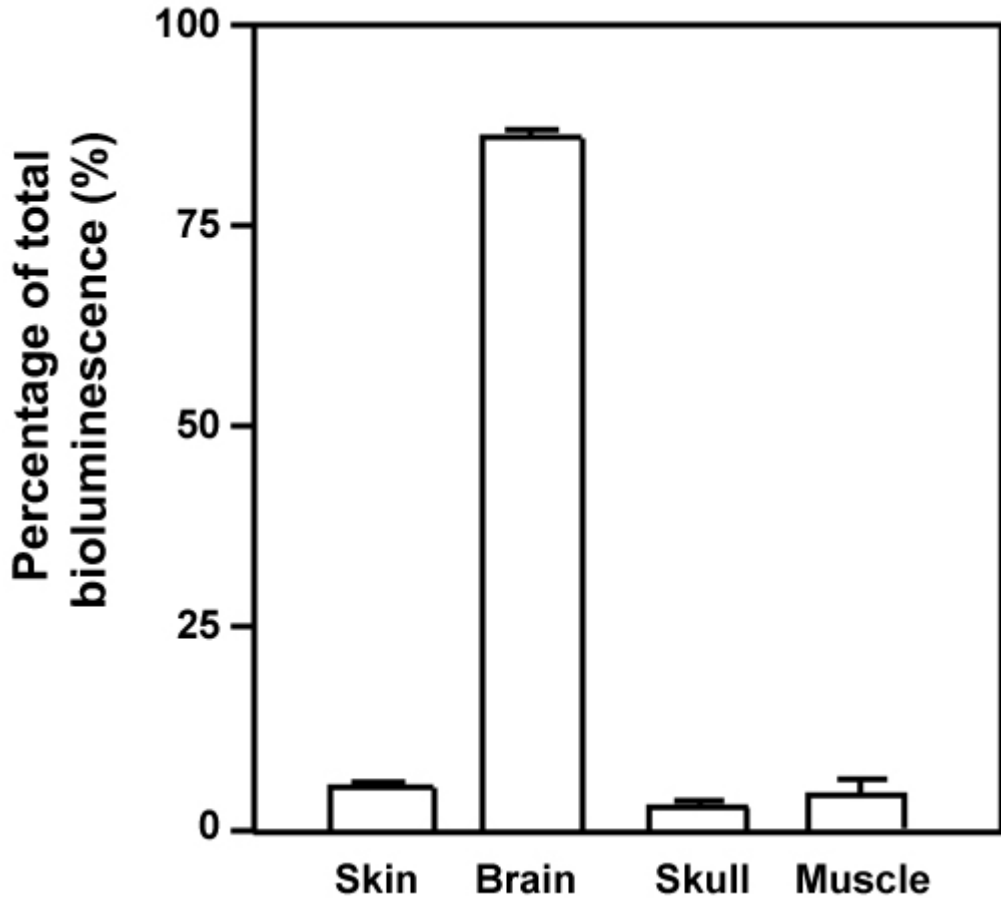

Supplement: pnas_0605077103_3.pdf [file pnas_0605077103_3.pdf]

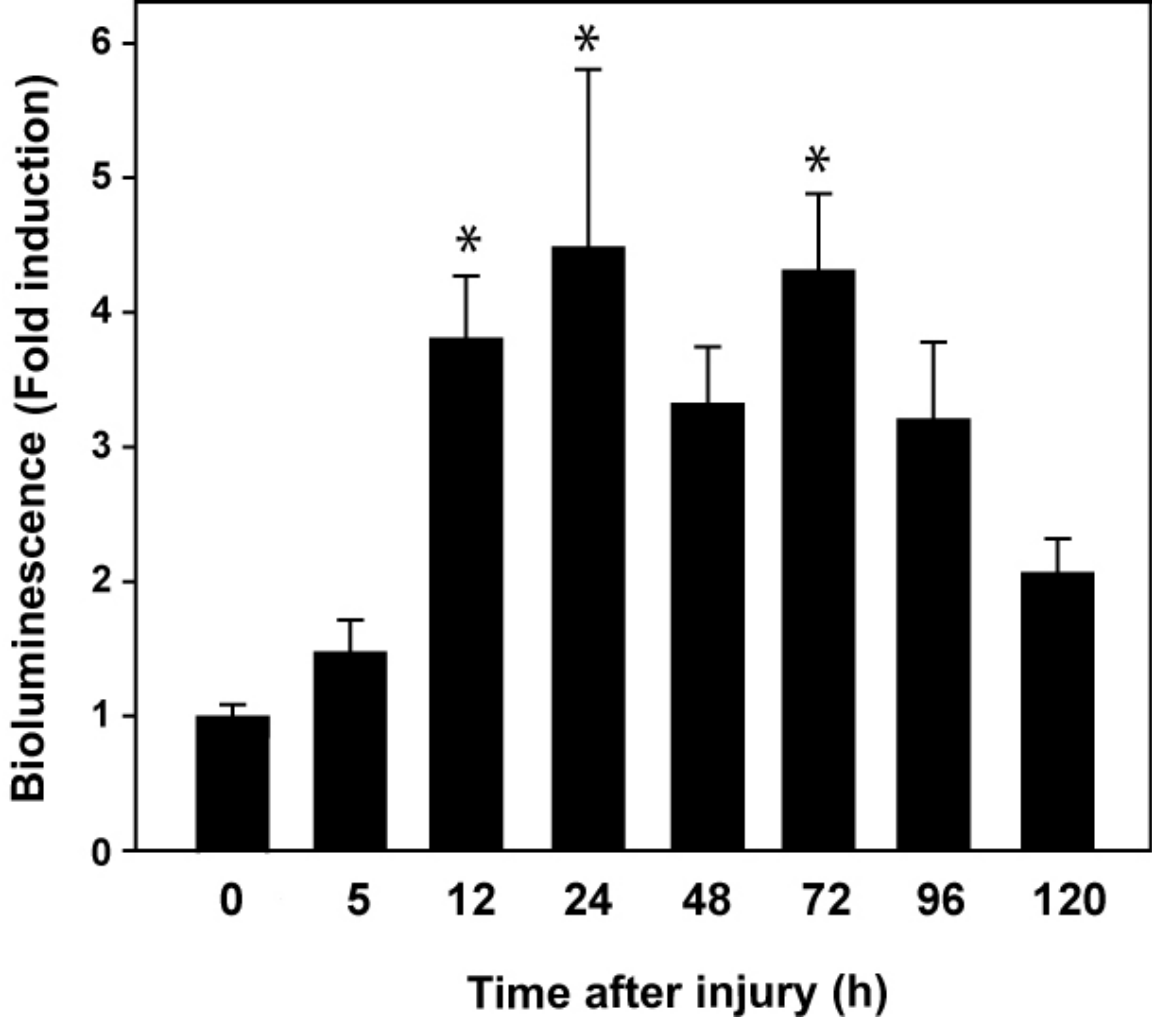

Supplement: pnas_0605077103_4.pdf [file pnas_0605077103_4.pdf]

PBS

KA (mouse 1)

KA (mouse 2)

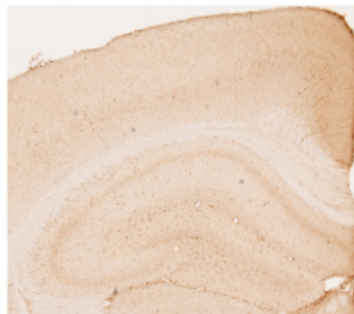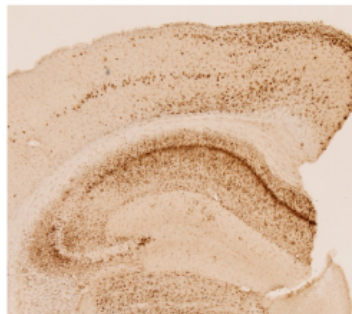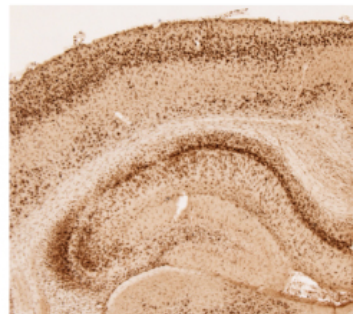

Cortex

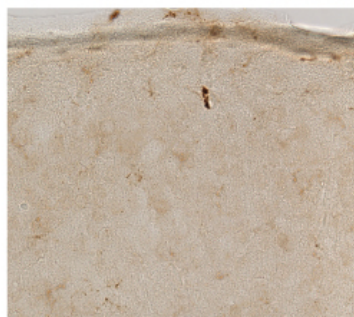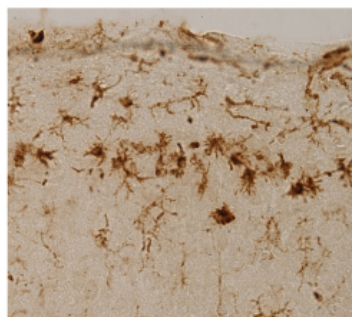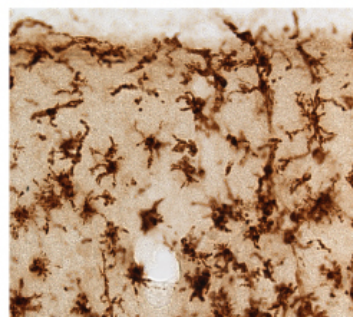

CA1

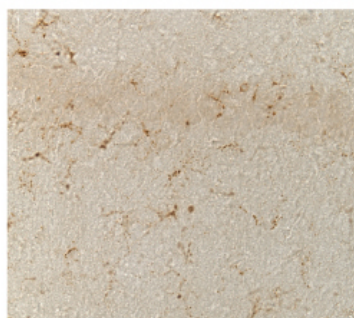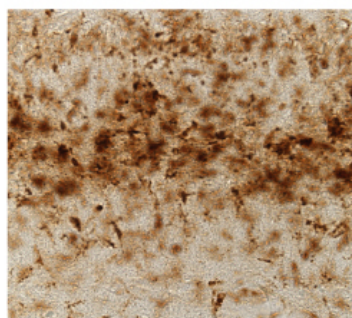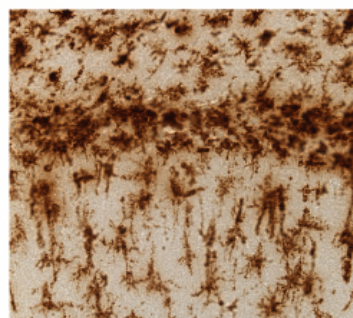

CA3

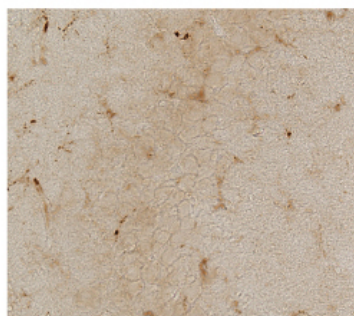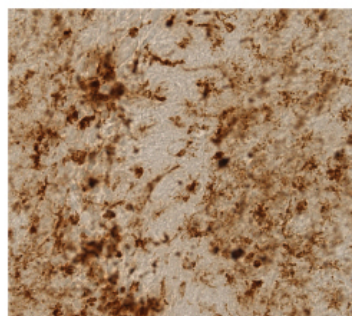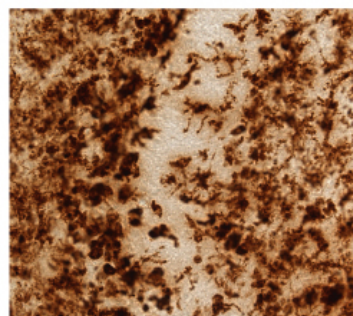

Supplement: pnas_0605077103_5.pdf [file pnas_0605077103_5.pdf]

PBS

KA (mouse 1)

KA (mouse 2)

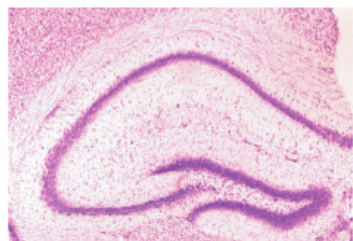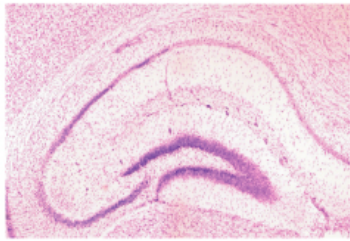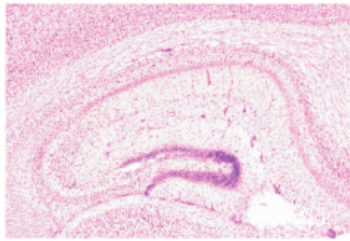

CA1

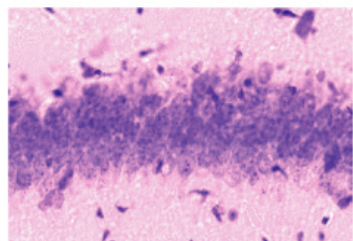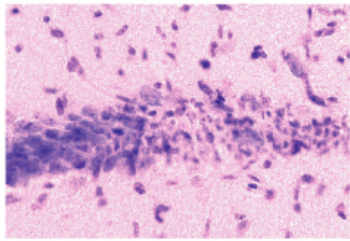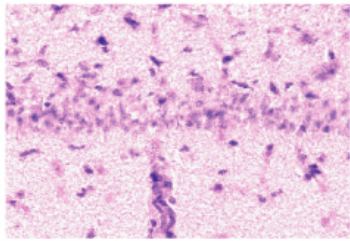

CA3

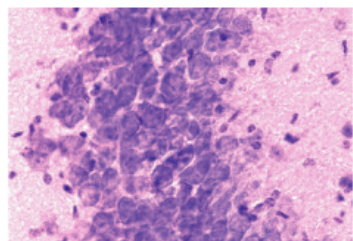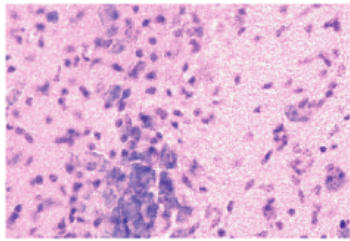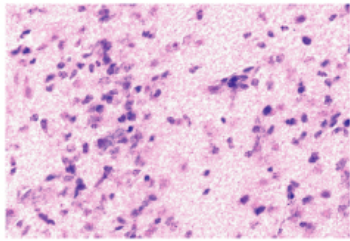

Supplement: pnas_0605077103_6.pdf [file pnas_0605077103_6.pdf]

PBS

KA (mouse 1)

KA (mouse 2)

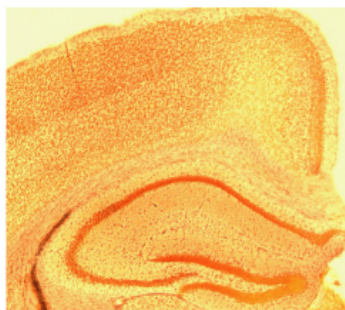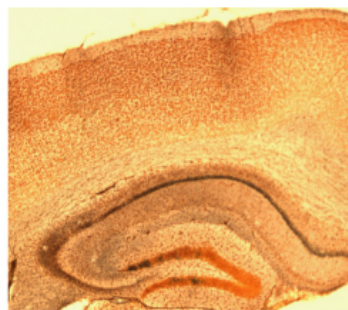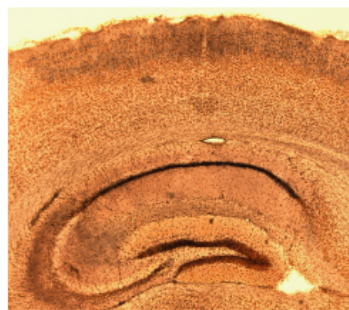

CA1

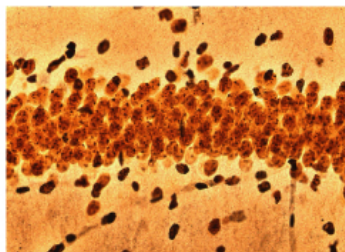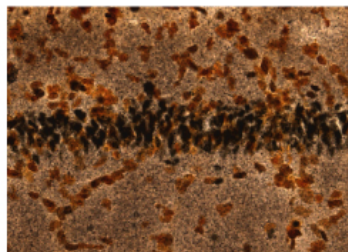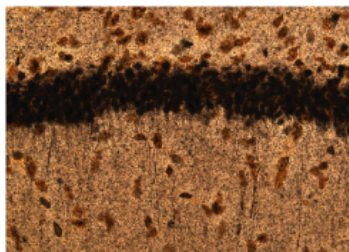

Cortex

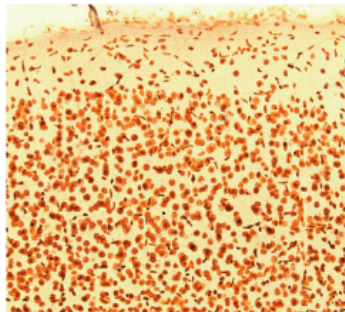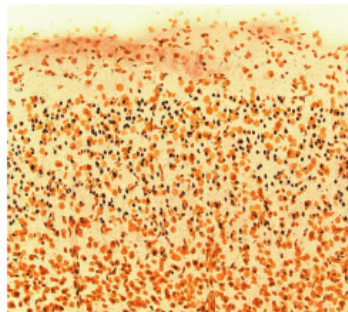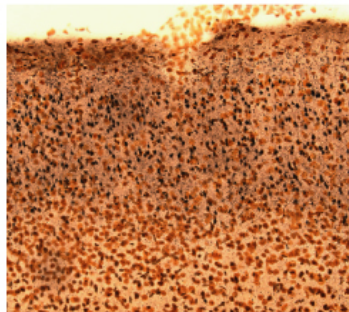

Supplement: pnas_0605077103_7.pdf [file pnas_0605077103_7.pdf]

PBS

KA (mouse 1)

KA (mouse 2)

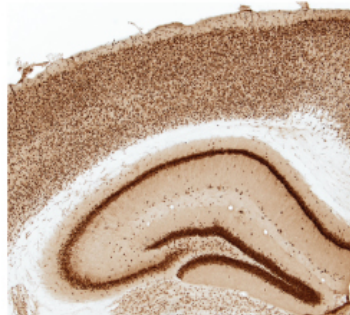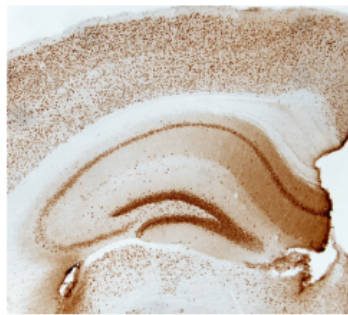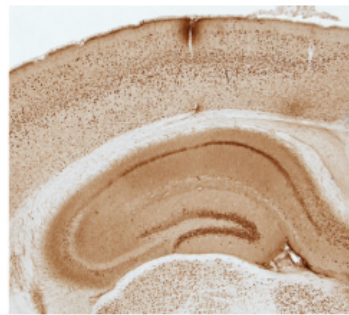

CA1

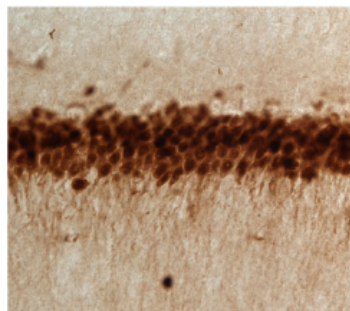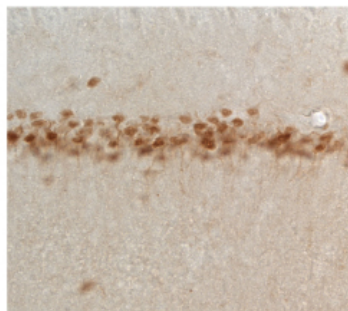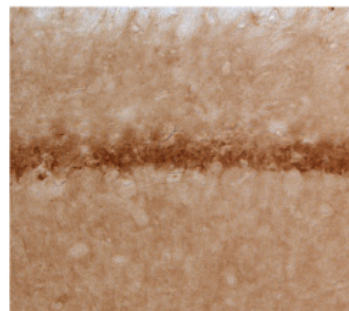

CA3

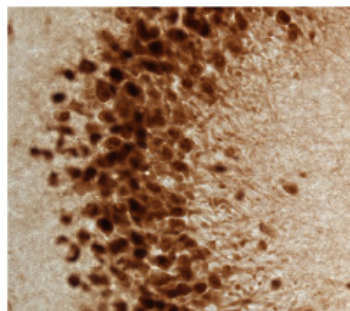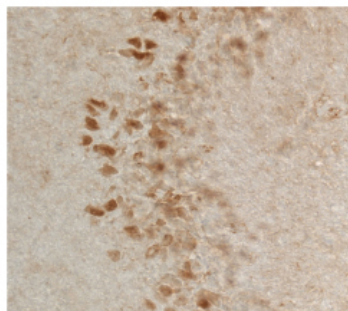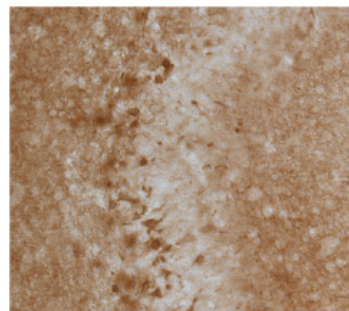

Cortex

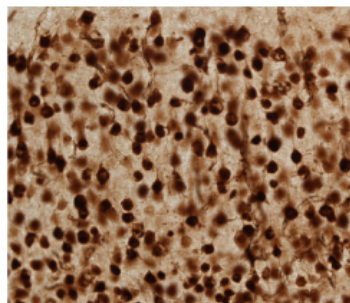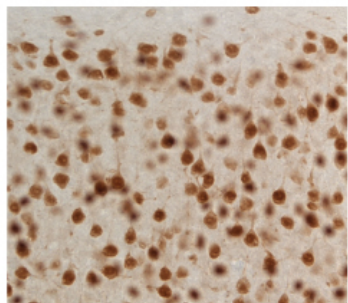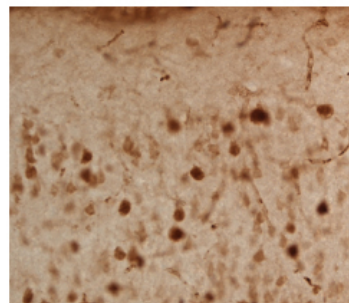

Supplement: pnas_0605077103_8.pdf [file pnas_0605077103_8.pdf]
